# Supplementary material for: Visualizing defect energetics
Source: Royal Society of Chemistry journal article supplement (doi:10.1039/d1mh00397f), 2021-01-01
Supplement: d1mh00397f1.pdf [file d1mh00397f1.pdf]

# Supplementary Information: Visualizing Defect Energetics

Shashwat Anand\*, James P. Male, Chris Wolverton, and G. Jeffrey Snyder\*

*Department of Materials Science and Engineering, Northwestern University, Evanston*

E-mail: sanand@lbl.gov

## Chemical potential diagram construction from the convex-hull

The chemical potentials pertaining to various phase equilibria are needed for calculating point defect formation energies.<sup>1-3</sup> The range of such chemical potentials available for calculations can be directly visualized from a convex-hull construction (Figure S1). In the  $A$ - $B$  model system, the energies at the  $y$ -intercepts of a "common-tangent" line on the  $A$  and  $B$  energy axes are  $\Delta\mu_A$  and  $\Delta\mu_B$ , respectively. As an example, for  $AB$  in equilibrium with  $A$  (Figure S1a), the  $y$ -intercepts of the line between the two compounds gives  $\Delta\mu_A = 0$  and  $\Delta\mu_B < 0$ , as expected in equilibrium with elemental  $A$ . Similarly,  $AB$  in equilibrium with  $B$  (Figure S1c) gives  $\Delta\mu_B = 0$  and  $\Delta\mu_A < 0$ . A compound  $AB$  that is not in established equilibrium with either  $A$  or  $B$  (Figure S1b) will have both  $\Delta\mu_A < 0$ ,  $\Delta\mu_B < 0$ .

Visualizing chemical potentials in the frequently used chemical potential space requires only the information from the convex-hull  $y$ -intercepts. In a typical binary chemical potential diagram, the  $x$ - and  $y$ -axes represent  $\Delta\mu$  for each element (see right column of Figure S1). For the  $A - B$  system with stable phases  $AB$ ,  $A$ , and  $B$ , the two possible phase equilibria for  $AB$  are with elemental  $A$  ( $\Delta\mu_A = 0$ ) or  $B$  ( $\Delta\mu_B = 0$ ). Applying the common-tangent approach to the convex-hull, as described above, allows one to plot  $\Delta\mu_A$  and  $\Delta\mu_B$  for any

composition constrained by available phase equilibria. In chemical potential space, a line drawn through the results encompasses all accessible chemical potentials for the  $AB$  phase. A similar plot can be made for metastable  $AB_3$ . However, the magnitudes of  $\Delta\mu_B$  and  $\Delta\mu_A$  will be lower than those for compound  $AB$  across the entire composition range, indicating less favorable energetics for formation (Figure S1(a-c)). Only phases with the lowest-lying lines in chemical potential space are stable. Additionally, the slope of a line drawn in chemical potential space represents stoichiometry. In the example provided, the slope for phases  $AB$  and  $AB_3$  are -1 and -1/4, respectively.

As additional phases "break" the convex-hull and become stable, they can reduce the range of accessible chemical potentials for other phases in the system. Following the example of Figure S1, when a phase  $AB_3$  becomes stable (Figure S1d), the  $B$ -rich equilibrium for phase  $AB$  is no longer between  $AB$  and  $B$  - but rather between  $AB$  and  $AB_3$ . Correspondingly, the line representing  $AB_3$  in chemical potential space (right column of Figure S1d) drops below that of  $AB$ , signifying that the  $AB$  phase is no longer stable at certain compositions. As a result, the lowest magnitude of  $\Delta\mu_B$  in  $AB$  must be some finite value greater than 0.

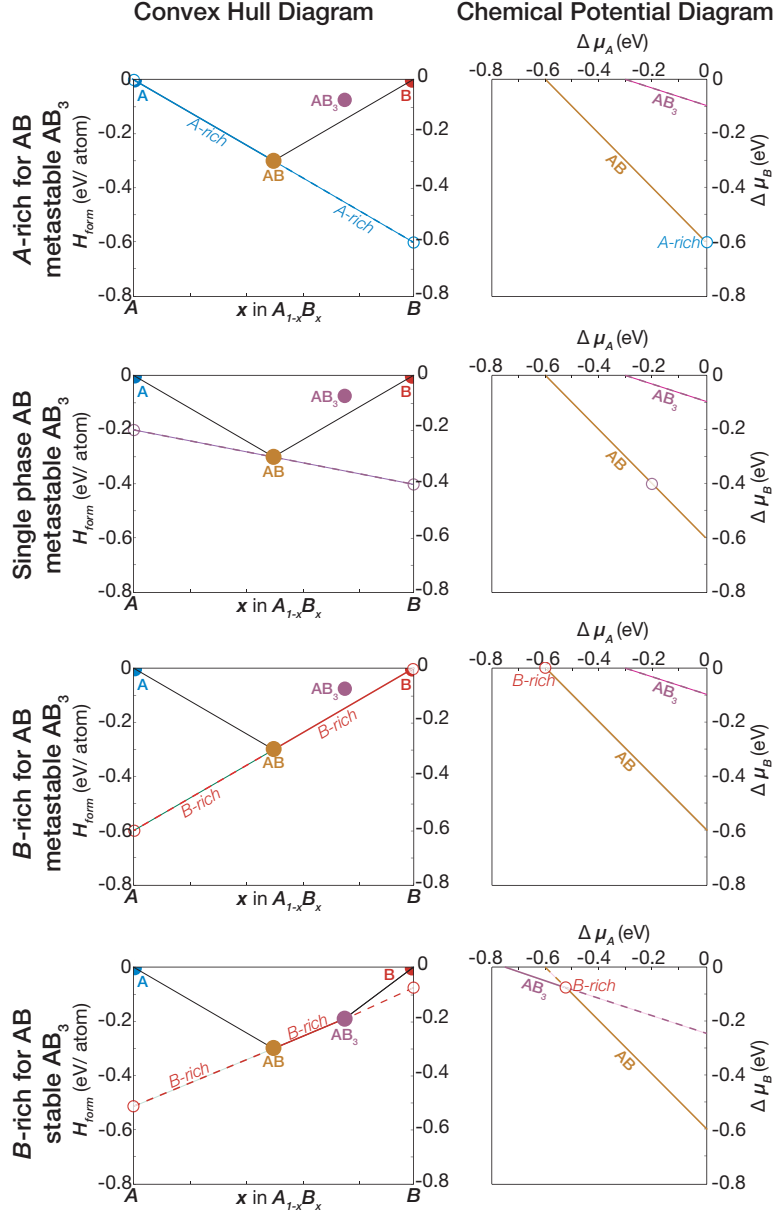

Figure S1: (a-c) A convex-hull construction for the hypothetical  $A - B$  binary system (left column) with stable phases  $A$ ,  $B$ , and  $AB$  and metastable phase  $AB_3$ . (a) When phase  $AB$  is in equilibrium with  $A$  ( $\Delta\mu_A = 0$ ), the change in elemental chemical potentials,  $\Delta\mu_A$  and  $\Delta\mu_B$ , are directly read from the  $y$  intercepts of the line connecting  $AB$  and  $B$  and plotted in chemical potential space (right column). (b) Shifting equilibrium from  $AB$  and  $A$  diverts  $\Delta\mu_A$  and  $\Delta\mu_B$  from their extrema until reaching equilibrium between  $AB$  and  $B$  (c), where  $\Delta\mu_B = 0$ . The line connecting every chemical potential between the two equilibria captures the entire range of accessible chemical potentials for  $AB$ . (d) When phase  $AB_3$  becomes stable, the line representing its chemical potentials falls below that of phase  $AB$  in chemical potential space. Phase equilibrium between  $AB$  and  $B$  is no longer possible, and is replaced by equilibrium between  $AB$  and  $AB_3$ , reducing the range of  $\Delta\mu_B$  accessible.

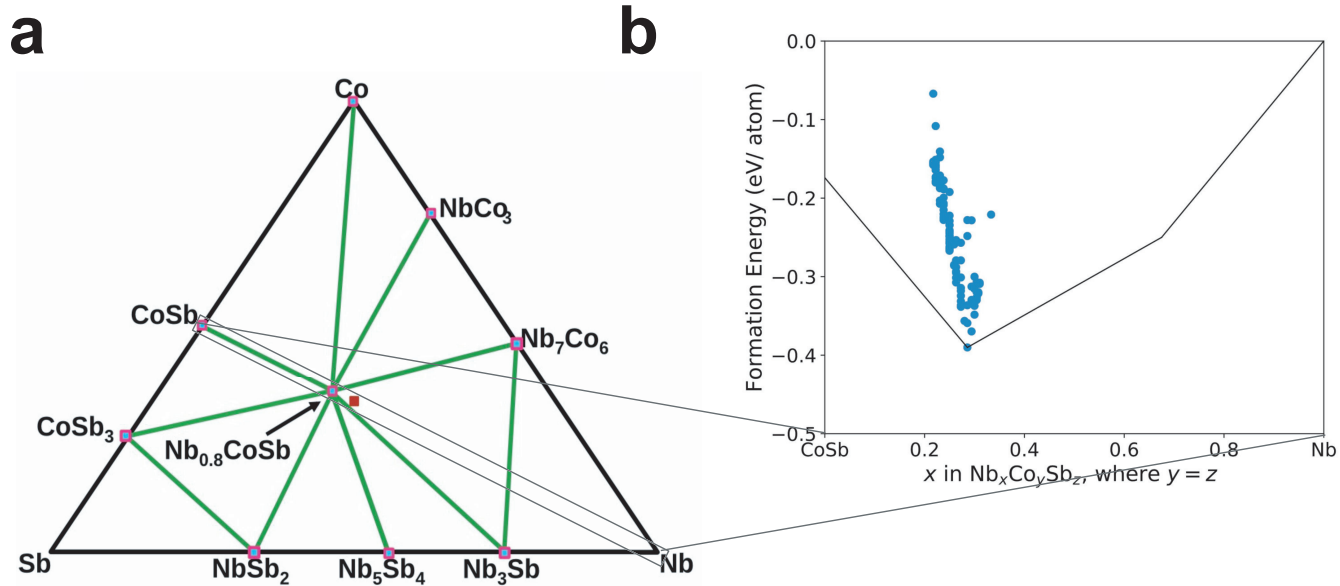

Figure S2: Convex-hull of the Nb-Co-Sb system calculated using<sup>4</sup> DFT along the composition slice CoSb-Nb. The Nb<sub>0.8</sub>CoSb structure and the defects in it are shown using blue circles.

# Numerical proof for defects in ternary compound

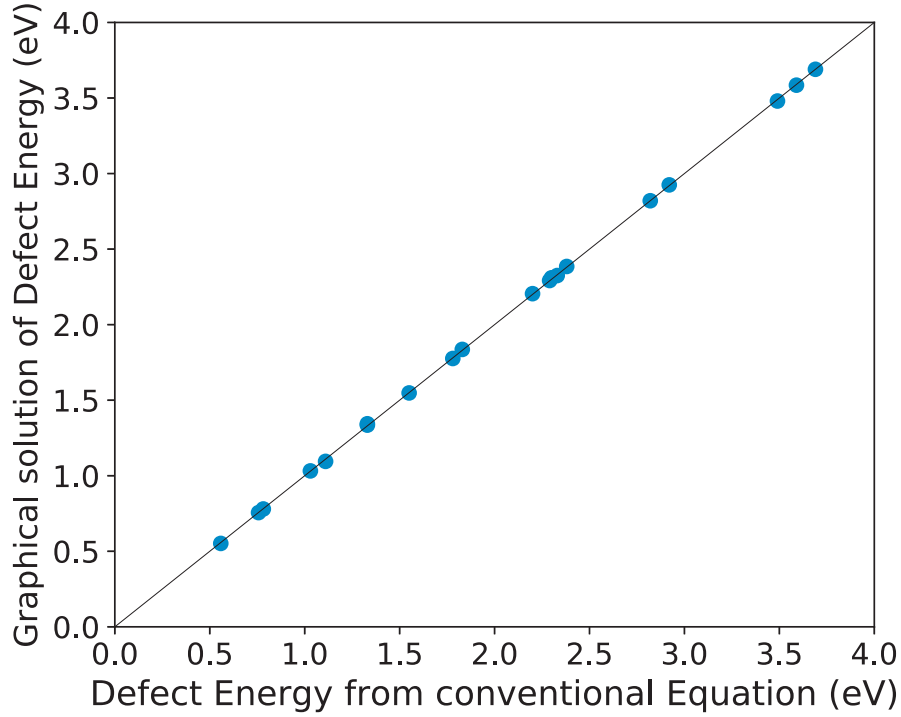

Figure S3: Comparison of defect energies for 20 half-Heusler systems calculated graphically to those determined using conventional defect energy expression

## References

- (1) Ohno, S.; Imasato, K.; Anand, S.; Tamaki, H.; Kang, S. D.; Gorai, P.; Sato, H. K.; Toberer, E. S.; Kanno, T.; Snyder, G. J. Phase boundary mapping to obtain n-type  $\text{Mg}_3\text{Sb}_2$ -based thermoelectrics. *Joule* **2017**,
- (2) Doak, J. W.; Michel, K. J.; Wolverton, C. Determining dilute-limit solvus boundaries in multi-component systems using defect energetics: Na in PbTe and PbS. *Journal of Materials Chemistry C* **2015**, *3*, 10630–10649.
- (3) Goyal, A.; Gorai, P.; Peng, H.; Lany, S.; Stevanović, V. A computational framework for

automation of point defect calculations. *Computational Materials Science* **2017**, *130*, 1–9.

- (4) Zeier, W. G.; Anand, S.; Huang, L.; He, R.; Zhang, H.; Ren, Z.; Wolverton, C.; Snyder, G. J. Using the 18-Electron Rule To Understand the Nominal 19-Electron Half-Heusler NbCoSb with Nb Vacancies. *Chemistry of Materials* **2017**, *29*, 1210–1217.
